# Supplementary material for: Electrochemical sensor formed from poly(3,4-ethylenedioxyselenophene) and nitrogen-doped graphene composite for dopamine detection
Source: Royal Society of Chemistry journal article supplement (doi:10.1039/d1ra07024j), 2021-01-01
Supplement: d1ra07024j1.pdf [file d1ra07024j1.pdf]

## Supplementary Material

### Electrochemical Sensor Formed from a Poly(3,4- ethylenedioxy-selenophene) and Nitrogen-doped Graphene Composite for Dopamine Detection

Aygul Kadir<sup>a,b</sup>, Ruxangul Jamal<sup>b</sup>, Tursun Abdiryim<sup>a\*</sup>, Nurbiya Sawut<sup>a</sup>,  
Yuzhu Che<sup>a</sup>, Zulpikar Helil<sup>a</sup>, Hujun Zhang<sup>a</sup>

<sup>a</sup> Key Laboratory of Energy Materials Chemistry, Ministry of Education; Key Laboratory of Advanced Functional Materials, Autonomous Region; Institute of Applied Chemistry, College of Chemistry, Xinjiang University, Urumqi, 830046, Xinjiang, PR China.

<sup>b</sup> Key Laboratory of Petroleum and Gas Fine Chemicals, Ministry of Education; College of Chemical Engineering, Xinjiang University, Urumqi, 830046, Xinjiang, PR China.

\* Corresponding author

E-mail: [tursunabdir@sina.com.cn](mailto:tursunabdir@sina.com.cn); [jruxangul@sina.com](mailto:jruxangul@sina.com)

<sup>1</sup> These authors contributed equally to this work.

## 1. Synthesis of EDOS

2,3-dimethoxy-1,3-butadiene was synthesized according to a previously reported method [23].

EDOS was synthesized according to a previously reported method [16]. First prepared  $\text{SeCl}_2$ ,  $\text{SO}_2\text{Cl}_2$  and selenium powder were as reactants, and n-hexane as solvent. A solution of freshly-prepared  $\text{SeCl}_2$  in hexanes was added to a well-stirred mixture of 2,3-dimethoxy-1,3-butadiene (24.0 g, 210 mmol) and  $\text{CH}_3\text{COONa}$  (8.2 g, 100 mmol) (as the buffering agent) in hexanes (250 mL) (as the solvent) at  $-78\text{ }^\circ\text{C}$  (dry ice/acetone bath) under an inert atmosphere. The resulting yellowish solution was further stirred for 1 h at  $-78\text{ }^\circ\text{C}$  and the reaction mixture was warmed to room temperature stirred for another 4 h. The reaction mixture was filtered and washed with n-hexane. The residue was concentrated to provide a brown oil that was purified by recrystallization in hexanes at low temperature to furnish a white crystalline solid.  $^1\text{H}$  NMR (400 MHz,  $\text{CDCl}_3$ ):  $\delta$  (ppm) = 6.55 (s, 2H), 3.85 (s, 6H).

A solution of 3,4-dimethoxyselenophene (1 g, 5.24 mmol), with 6 equivalents of ethylene glycol (2 g, 32.41 mmol) and a *p*-toluene sulfonic acid (160 mg) (as catalytic agent) in dry toluene (150 mL) was stirred for 12 h at  $50 - 55\text{ }^\circ\text{C}$ . Toluene was removed under reduced pressure, and the residue was diluted with water (100 mL). The mixture was extracted with dichloromethane (3 x 50 mL). The combined organic layers were washed with dilute NaCl solution and brine and then Spinning solvent to concentrated. Purification of the crude residue by silica gel chromatography gave 3,4-ethylenedioxy-selenophene as a colorless liquid.  $^1\text{H}$  NMR (400 MHz,  $\text{CDCl}_3$ ):  $\delta$  (ppm)

= 6.79 (s, 2H), 4.17 (s, 4H).

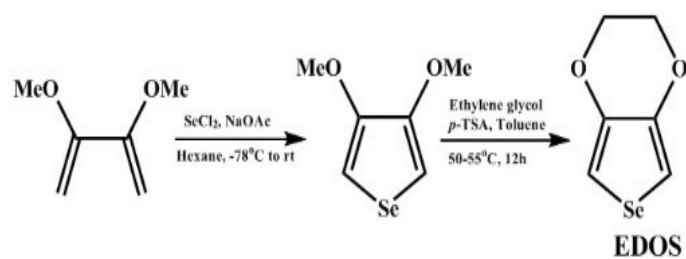

**Scheme S 1.** The synthetic route of EDOS monomers

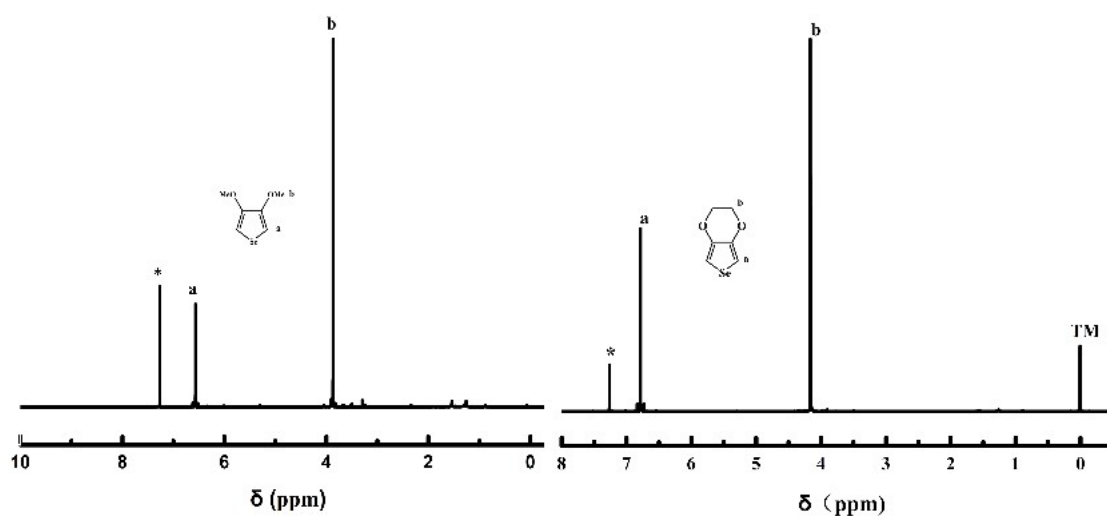

**Fig. S 1**  $^1\text{H-NMR}$  spectra of 3,4-dimethoxyselephenylene and EDOS in  $\text{CDCl}_3$

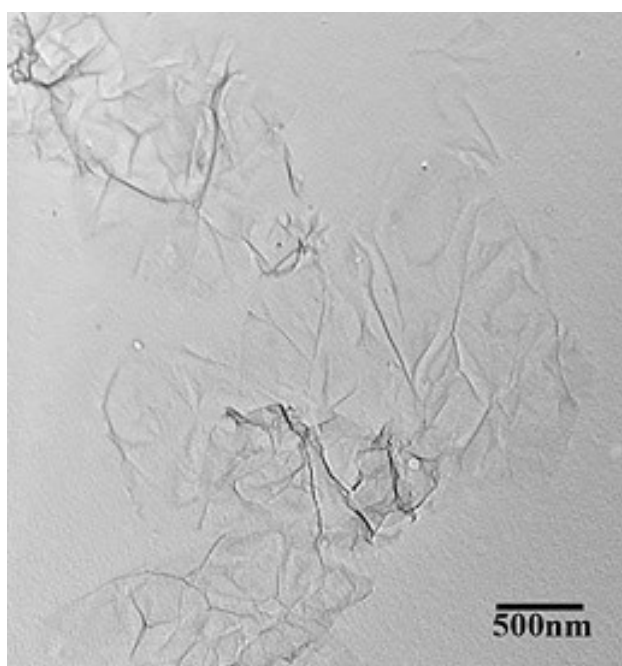

**Fig. S 2** TEM of N-Gr

**Table S1** C, O, N and Se atomic concentrations of N-Gr, PEDOS and PEDOS/N-Gr

| Sample     | C1s (%) | O1s (%) | N1s (%) | Se3d (%) |
|------------|---------|---------|---------|----------|
| N-Gr       | 84.30   | 12.11   | 3.56    | -        |
| PEDOS      | 73.75   | 19.90   | -       | 6.35     |
| PEDOS/N-Gr | 61.87   | 19.53   | 2.66    | 6.50     |

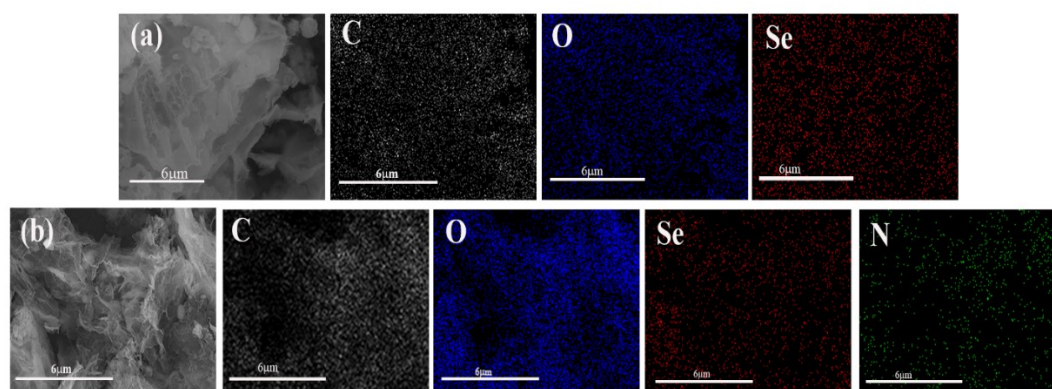**Fig. S 3** Mapping images of (a) PEDOS (b)PEDOS/N-Gr**Table S 2** Detection performances of modified GCEs

| Sample     | Linear response range (mM) | Linear regression equation | R <sup>2</sup> | Limit of detection (mM) | Sensitivity (mAmM <sup>-1</sup> cm <sup>-2</sup> ) |
|------------|----------------------------|----------------------------|----------------|-------------------------|----------------------------------------------------|
| PEDOS/N-Gr | 0.008-80                   | $y=39.68+10.9x$            | 0.996          | 0.0066                  | 28.9                                               |
|            |                            | $y=78.9+0.43x$             | 0.996          |                         |                                                    |
| PEDOT/N-Gr | 0.04-70                    | $y=50.35+2.3x$             | 0.997          | 0.018                   | 18.3                                               |
|            |                            | $y=71.15+0.4x$             | 0.992          |                         |                                                    |

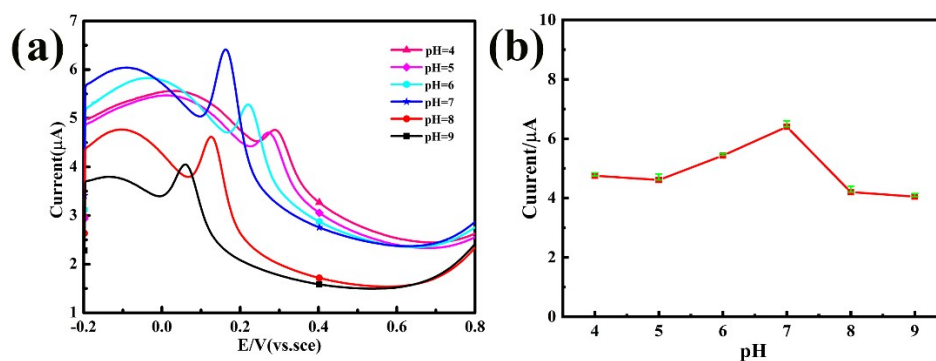**Fig. S 4** Effects of a pH values on the high value currents of DA at N-Gr/PEDOS/GCE (in 0.1 M

PBS containing 5  $\mu$ M DA); b shows their linear relationship.

## Calculation of the effective electrode surface area

To evaluate the importance of the modified electrode surface toward the electrochemical oxidation of  $[\text{Fe}(\text{CN})_6]^{3-/4-}$ , we have calculated the effective electrode surface area values of bare GCE and for the modified electrodes, the Randles–Sevcik equation was used<sup>56</sup>. The corresponding linear plots between  $v^{1/2}$  and  $I_{pa}$  indicated the diffusion-controlled processes. The Randles–Sevcik equation is as following:

$$I_{pa} = 2.69 \times 10^5 n^{3/2} AD^{1/2} v^{1/2} C$$

Where  $I_{pa}$  is the anodic peak current, A shows the effective electrode surface area, D is the diffusion coefficient of the  $\text{K}_3\text{Fe}(\text{CN})_6$  ( $D=6.5 \times 10^{-5}$ ),  $n$  is the electron transfer number of the electrode reaction ( $n = 1$ ),  $v$  is the sweep speed, C is the concentration of the  $\text{K}_3\text{Fe}(\text{CN})_6$  ( $C = 0.5 \text{ mol/cm}^3$ ) and the other symbols have their usual meaning. The effective electrode surface area values for bare GCE, PEDOT/N-Gr/GCE and PEDOT/N-Gr/GCE were found to be 0.132, 0.29, and 0.37  $\text{cm}^2$ , respectively.

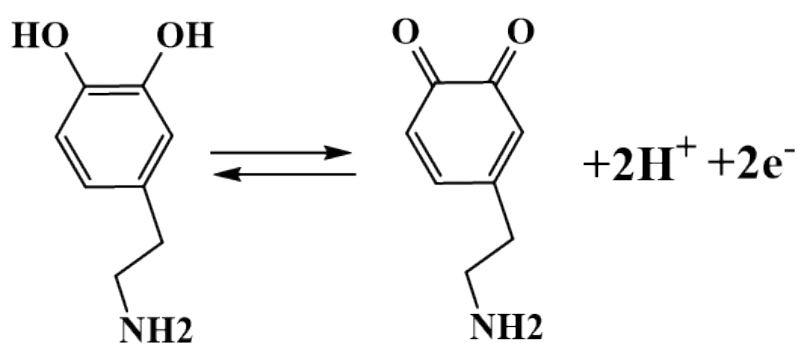

**Scheme S2.** Mechanisms for electrooxidation of dopamine.

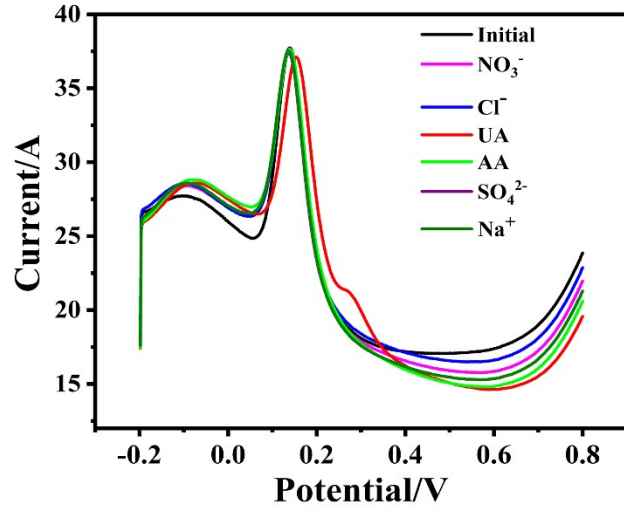

Fig. S 5 Interference test of PEDOS/N-Gr/GCE real DPV data

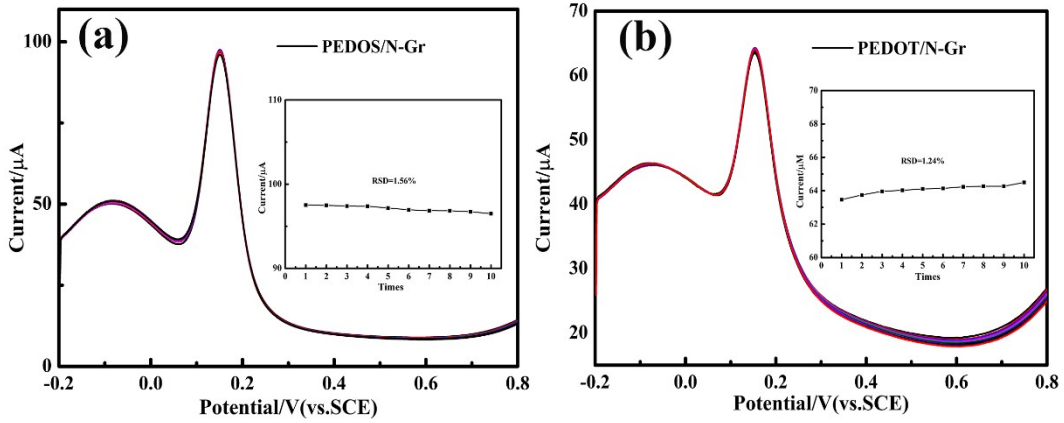

Fig. S 6 (a) DPV response of 5mM DA with the prepared sensors for ten times PEDOS/N-Gr/GCE, (b) DPV response of 5mM DA with the prepared sensors for ten times PEDOT/N-Gr/GCE

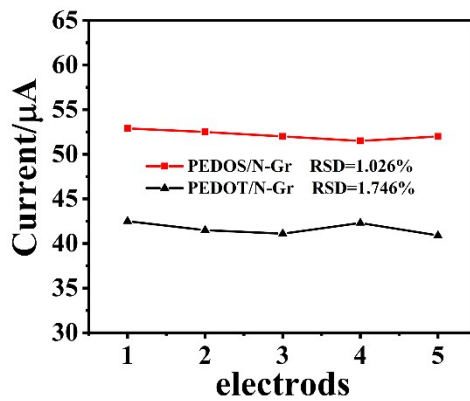

Fig. S 7 Reproducibility of composites modified GCEs
